# Supplementary material for: Making the cut on caesarean section: a logistic regression analysis on factors favouring caesarean sections without medical indication in comparison to spontaneous vaginal birth
Source: Springer Nature journal article supplement (doi:10.1186/s12884-023-06070-x), 2023-10-27
Supplement: MOESM1 [file 26232136]

Additional file1: Diagnoses used to exclude cases from the not medically indicated CS dataset

| <b>ICD-10-GM codes</b> | <b>Definition</b>                                                                                       |
|------------------------|---------------------------------------------------------------------------------------------------------|
| O32.-                  | Care of the mother in the event of a detected or suspected positional and attitude anomaly of the fetus |
| O33.-                  | Care of the mother in case of identified or suspected mismatch between fetus and pelvis                 |
| O34.2                  | Care for the mother with uterine scarring due to previous surgery                                       |
| O61.0                  | Failed medical induction of labor                                                                       |
| O61.1                  | Failed instrumental induction of labor                                                                  |
| O62.-                  | Abnormal labor                                                                                          |
| O63.-                  | Protracted birth                                                                                        |
| O64.-                  | Obstruction of birth due to positional, postural and attitude anomalies of the fetus                    |
| O65.-                  | Obstruction of birth due to anomaly of the maternal pelvis                                              |
| O68.-                  | Complications of labor and delivery due to fetal distress [fetal danger]                                |
| O69.-                  | Complications of labor and delivery due to umbilical cord complications                                 |
