# Supplementary material for: Making the cut on caesarean section: a logistic regression analysis on factors favouring caesarean sections without medical indication in comparison to spontaneous vaginal birth
Source: Springer Nature journal article supplement (doi:10.1186/s12884-023-06070-x), 2023-10-27
Supplement: MOESM2 [file 26232136]

Additional file 2: Treatments used to exclude cases from the not medically indicated CS dataset

| <b>CHOP codes</b> | <b>Definition</b>                                       |
|-------------------|---------------------------------------------------------|
| 74.0X.20          | Classic cesarean section, emergency                     |
| 74.1X.20          | Deep cervical cesarean section, emergency               |
| 74.2X.20          | Extraperitoneal cesarean section, emergency             |
| 74.4X.20          | Cesarean section of a different type, emergency         |
| 74.99.20          | Other unspecified types of cesarean sections, emergency |

CHOP = Swiss operation procedures
